# Supplementary material for: Ultrasmall Co3O4 nanoparticles as a long-lived high-rate lithium-ion battery anode
Source: Royal Society of Chemistry journal article supplement (doi:10.1039/d3dt00127j), 2023-01-01
Supplement: d3dt00127j1.pdf [file d3dt00127j1.pdf]

## Supplementary Information

### Ultrasmall $\text{Co}_3\text{O}_4$ nanoparticles as long-lived high-rate lithium-ion battery anode

*Ping Wan,<sup>a</sup> Yang Si,<sup>a</sup> Shuang Zhu,<sup>a</sup> Changda Wang,<sup>a</sup> Yuyang Cao,<sup>a</sup> Zhen Yu,<sup>b</sup> Wenjie Wang,<sup>a</sup> Chen Chen,<sup>a</sup> Wangsheng Chu,<sup>\*a</sup> and Li Song,<sup>a</sup>*

- a. National Synchrotron Radiation Laboratory, University of Science and Technology of China, Hefei, Anhui 230029, P. R. China
- b. Hefei Institute for Advanced Research, Anhui University of Science and Technology, Hefei, Anhui 231131, P.R. China.

E-mail: chuws@ustc.edu.cn

Keywords: cobalt oxide, ultrasmall nanoparticles, particle size effect, lithium ion batteries

#### 1. Experimental

##### 1.1 Synthesis of the precursor Co-PBA nanoparticles

In a typical procedure, 3 mmol  $\text{K}_3\text{Co}(\text{CN})_6$ , 5.6 g PVP (K40) and 6 mmol  $\text{CoCl}_2 \cdot 6\text{H}_2\text{O}$  were dissolved into a mixed solution of 25 mL ethanol and 75 mL deionized water. The obtained pink solution was kept away from light for 24 h after stirred for 2 h. Then it was centrifuged and washed for several times with deionized water and ethanol and finally dried overnight at 100 °C under vacuum.

##### 1.2 Synthesis of the ultrasmall S- $\text{Co}_3\text{O}_4$ nanoparticles

The collected precursor Co-PBAs were crystallized at 360 °C for 1 h at a heating rate of 1 °C min<sup>-1</sup> under an air atmosphere.

By the way, the comparison sample C-Co<sub>3</sub>O<sub>4</sub> (commercial Co<sub>3</sub>O<sub>4</sub>) was just purchased from the Internet (Sinopharm Chemical Reagent Co., Ltd., SP).

### 1.3 Materials characterization

The XRD patterns were recorded on a D8-Advance power diffractometer equipped with a Cu K $\alpha$  radiation source ( $\lambda = 1.54178 \text{ \AA}$ ). The morphology of these samples was characterized by a field emission scanning electron microscopy (15 kV, JEOL, JSM-6700F) and TEM (JEOL JEM2010). Thermogravimetry (TG) measurement was carried out on a NETZSCH TG 209F1 Libra instrument in air flux at a scan rate of 10 °C min<sup>-1</sup>. Brunauer–Emmett–Teller (BET) surface areas were measured using Tristar II 3020 instrument by nitrogen adsorption at 77 K. Raman spectra were obtained from a LabRamHR using an argon ion laser with a wavelength of 785 nm. Co K-edge X-ray absorption fine structure (XAFS) was recorded at the 1W2B beamline of the Beijing Synchrotron Radiation Facility (BSRF, Beijing). X-ray absorption near edge structure (XANES) and extended X-ray absorption fine structure (EXAFS) data were both analysed by the ATHENA software package. To further obtain the magnitudes of the EXAFS spectra in R-space ( $\text{\AA}$ ), the extracted EXAFS signal was Fourier-transformed in  $k$ -ranges of 2.4-12.5  $\text{\AA}^{-1}$  by using a Hanning window function after weighted by  $k^2$ . The lengths of actual bond are approximately 0.2-0.4  $\text{\AA}$  longer because the Fourier-transformed peaks were not phase corrected. The soft X-ray absorption spectroscopy

(s-XAS) of Co L-edge was collected at the BL12B-a (MCD) line station of the Hefei Synchrotron Radiation Facility (HALF). To get the desired electrodes, the coin cells, which were charged or discharged to the desired cut-off voltages, have been disassembled by an electric crimping machine (MTI Co.). Finally, electrodes were washed with dimethyl carbonate (DMC) and sealed by a 3 M sellotape in Ar atmosphere after drying. The electrodes for XAFS and s-XAS were collected after fully charged or discharged for three or four cycles.

#### **1.4 Electrochemical measurements**

The battery tests were carried out in a half-cell configuration. Lithium disc was used as a counter electrode to assemble the CR2032-type coin cells, and all the processes were carried out in a glovebox filled with argon (MBraun, Germany). The working electrode consists of active materials, conductivity agent (Ketjenblack), and polymer binder (polyvinylidene fluoride, PVDF) with a weight ratio of 7:2:1. After mixed fully in N-methyl-2-pyrrolidinone, the obtained slurry was casted on Cu foil and dried at 110°C under vacuum overnight. After drying, slice to obtain circular electrodes with a diameter of 16 mm. The mass loading of the active material was 0.5-1 mg cm<sup>-2</sup>. The electrolyte was a solution of 1 M LiPF<sub>6</sub> in ethylene carbonate/dimethyl carbonate (EC/DMC, 1:1 in weight). Whatman Glass Microfibre Filter (Grade GF/D) were used as separator. The electrochemical performance of the cells was assessed on a Land CT2001A cell test system (Wuhan, China) in the range of 0.01-3 V (vs. Li<sup>+</sup>/Li). Cyclic voltammetry (CV) was measured from 0.01 to 3 V (vs. Li<sup>+</sup>/Li) at the scan rate of 0.2

$\text{mV s}^{-1}$ . Electrochemical impedance spectroscopy (EIS) testing with an amplitude of 10 mV from  $10^5$  Hz to 0.01 Hz. EIS and CV were both obtained on a CHI660D (Chenhua, Shanghai) electrochemical workstation.

## 2. Results and discussion

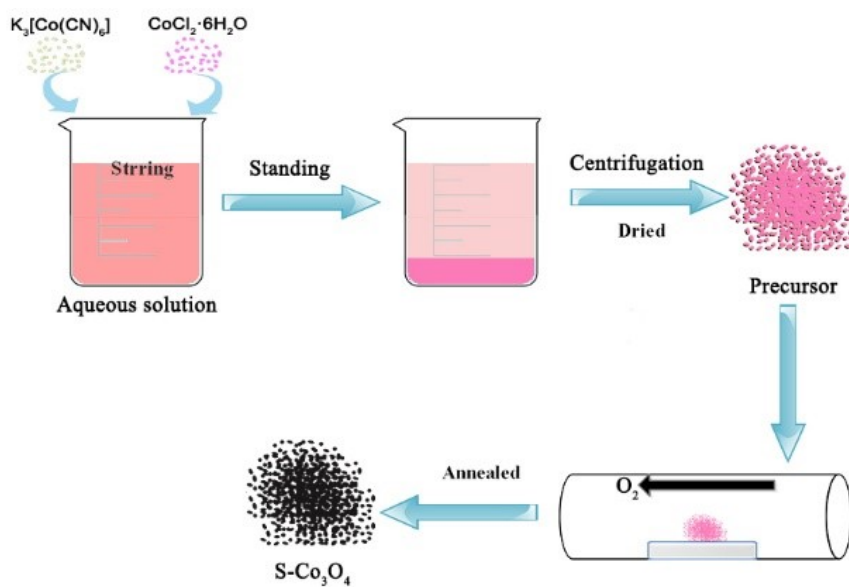

**Figure S1.** Diagrammatic sketch of synthesis process for S-Co<sub>3</sub>O<sub>4</sub> spinel sample.

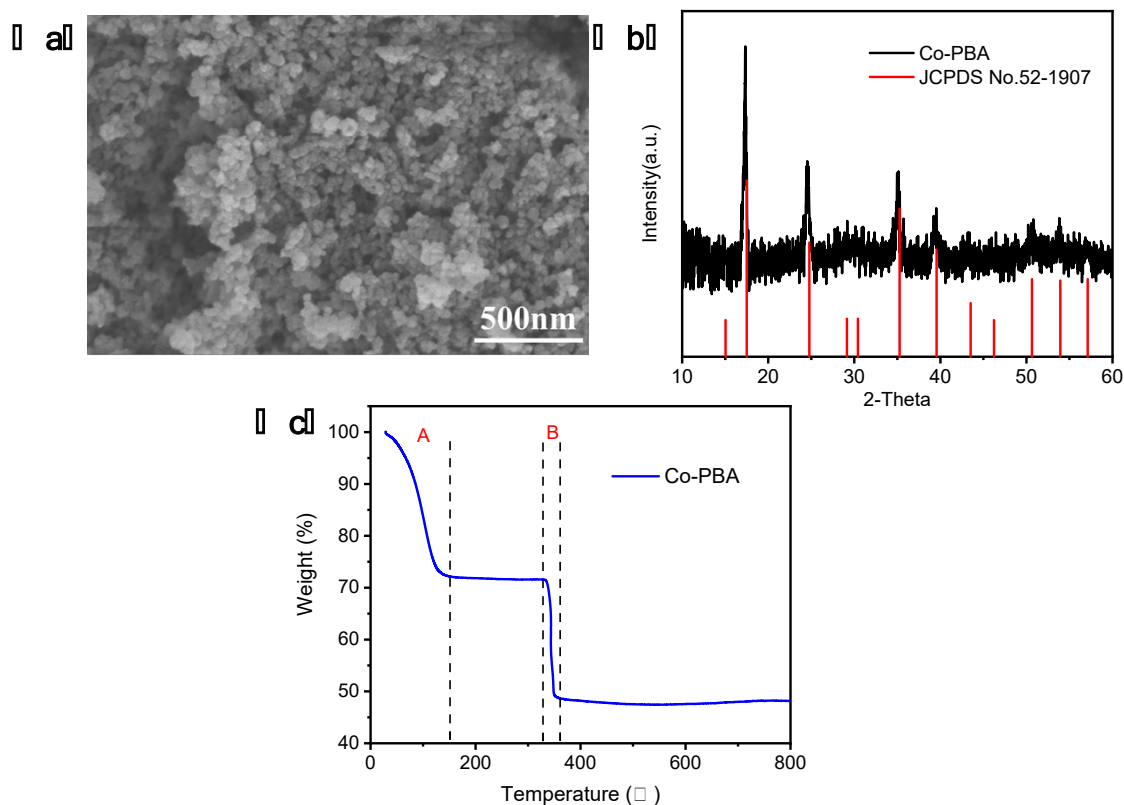

**Figure S2.** (a) SEM image, (b) XRD pattern and (c) TG curves of the precursor Co-PBA nanoparticles.

As shown in Fig. S2b, Co-based Prussian blue analogues (Co-PBA) can be indexed as a typical face-centered cubic structure (JCPDS no. 52-1907) with no impurity phase. Thermogravimetric (TG) characteristic (Fig. S2c) was employed to determine the optimum calcination temperature of the precursor. With temperature rising, the first mass drop occurs below 160 °C, corresponding to the loss of the adsorbed and interstitial water. The second drop occurs at 330-355 °C, corresponding to the phase transition to oxide. At subsequent temperatures up to 800 °C, the substance stabilizes

as  $\text{Co}_3\text{O}_4$ . Take hint from the TG data, phase-pure  $\text{Co}_3\text{O}_4$  was successfully prepared by annealing the precursor at  $360^\circ\text{C}$ .

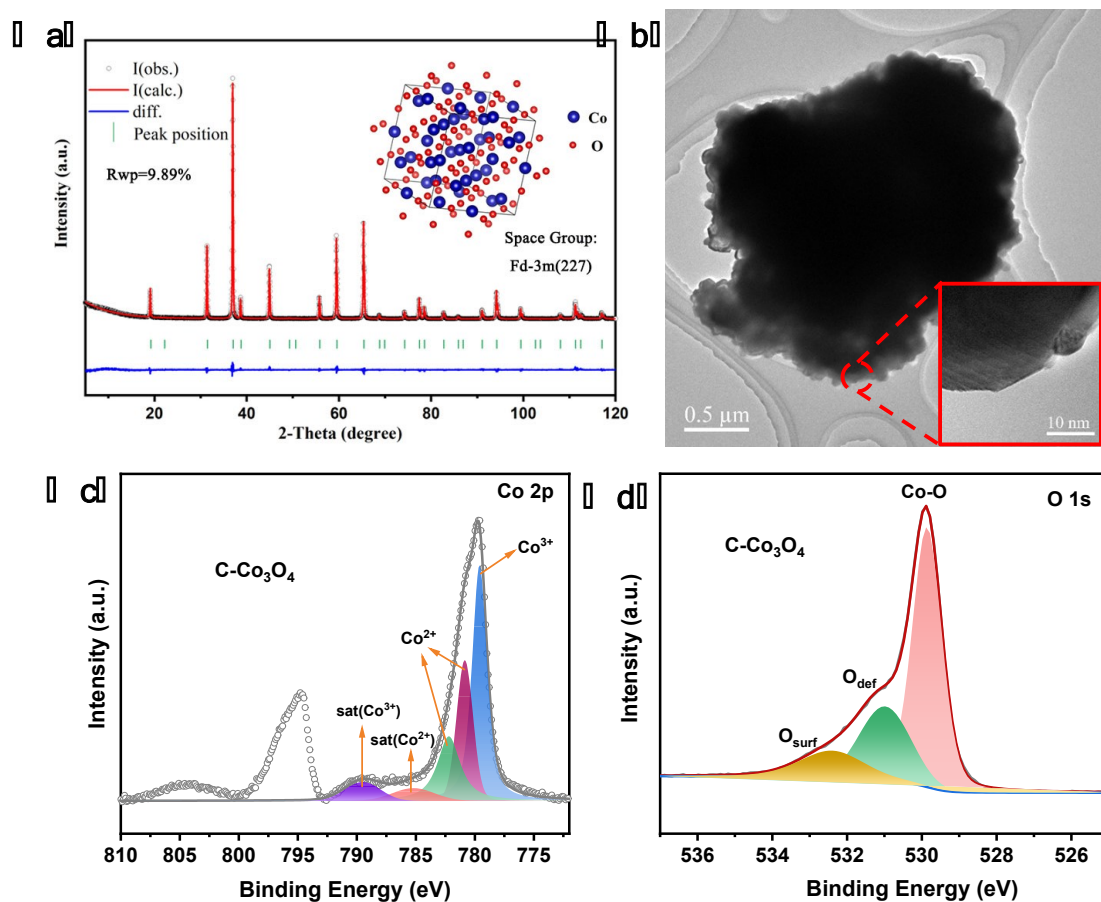

**Figure S3.** Structural and morphology characterization of the C-Co<sub>3</sub>O<sub>4</sub>. (a) Rietveld refinement of the PXRD data ( $a=b=c=8.066 \text{ \AA}$ ); (b) TEM image and a magnified view; XPS analysis of (c) Co 2p and (d) O 1s.

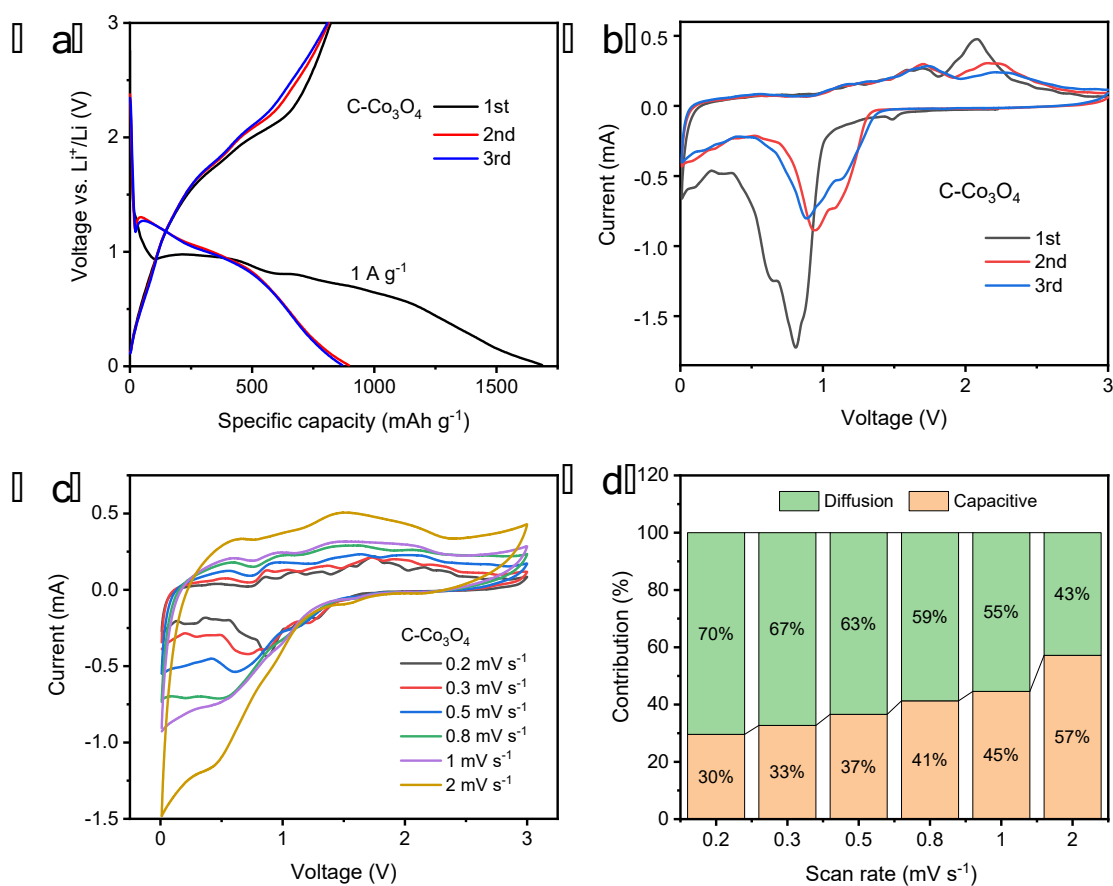

**Figure S4.** Electrochemical performance and kinetic analysis of C-Co<sub>3</sub>O<sub>4</sub> for lithium storage behavior. (a) Charge/discharge curves at 1 A g<sup>-1</sup>; (b) CV data at 0.2 mV s<sup>-1</sup>; (c) CV curves obtained with various scan rates; (d) The calculated contribution ratio of the capacitive and diffusion-controlled capacities at different scan rates.

The electrochemical reactions are summarized as follow:

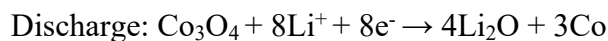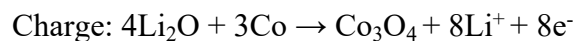

The theoretical capacity of Co<sub>3</sub>O<sub>4</sub> is 890 mAh g<sup>-1</sup>. The calculation is the following:

$C = nF/3.6M$ , where  $C$  is the theoretical specific capacity,  $n$  is the electron transfer

number ( $n=8$ ),  $F$  is the Faraday constant ( $F=96485\text{ C mol}^{-1}$ ), and  $M$  is the relative molecular mass ( $M=240.8\text{ g mol}^{-1}$ ).

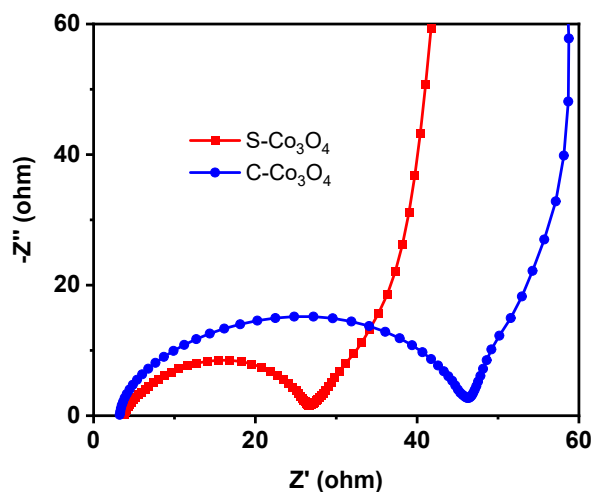

**Figure S5.** The impedance spectra of S-Co<sub>3</sub>O<sub>4</sub> anode and C-Co<sub>3</sub>O<sub>4</sub> anode .

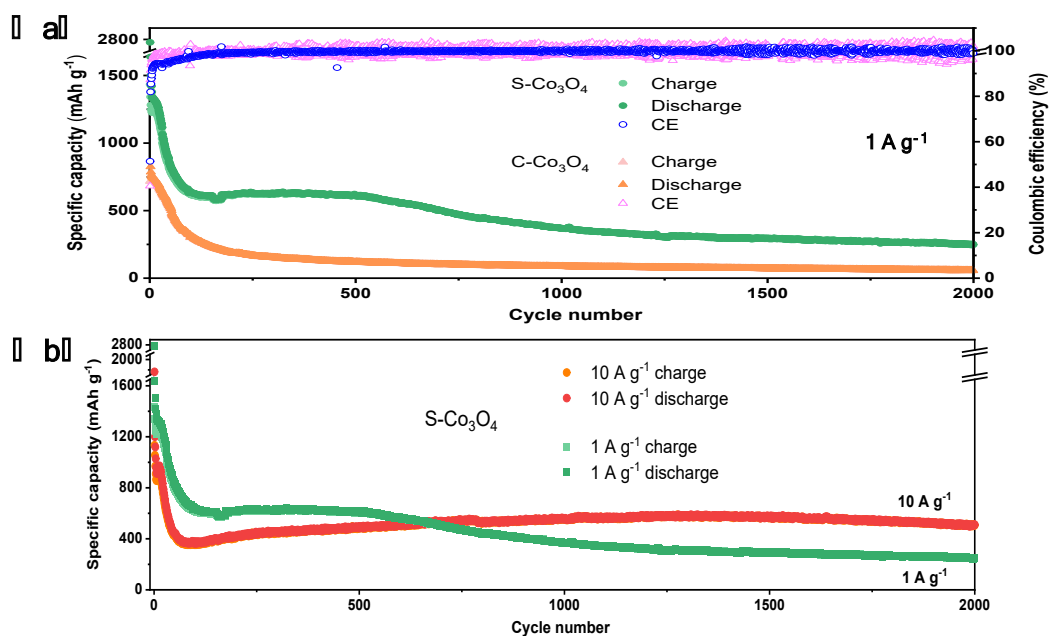



**Figure S6.** (a) Cycling performance at 1 A g<sup>-1</sup> of both S-Co<sub>3</sub>O<sub>4</sub> and C-Co<sub>3</sub>O<sub>4</sub>; (b)

Cycling performance of S-Co<sub>3</sub>O<sub>4</sub> at 10 A g<sup>-1</sup> and 1 A g<sup>-1</sup>.

As for the performance at 1 A g<sup>-1</sup> in Fig. S6a, for S-Co<sub>3</sub>O<sub>4</sub> electrode, a splendid electrochemical performance could also be found until the 510<sup>th</sup> cycle with over 610 mAh g<sup>-1</sup> capacity. Then the capacity started to decline, and finally exhibited 249.7 mAh g<sup>-1</sup> at the 2000<sup>th</sup> cycle. The capacity of C-Co<sub>3</sub>O<sub>4</sub> is evidently worse than that of S-Co<sub>3</sub>O<sub>4</sub>, which is also because that the large micro size brought less active sites and more serious structure collapse. Additionally, the steady capacity for S-Co<sub>3</sub>O<sub>4</sub> electrode at 10 A g<sup>-1</sup> at the 2000<sup>th</sup> cycle (511.2 mAh g<sup>-1</sup>) is amazingly superior than that at 1 A g<sup>-1</sup> at the same cycle (249.7 mAh g<sup>-1</sup>, Fig. S6b), which may be the result of different distribution of components in SEI at different current densities (Fig. S10), verify the superiority of the long-cycle high-rate application of S-Co<sub>3</sub>O<sub>4</sub>.

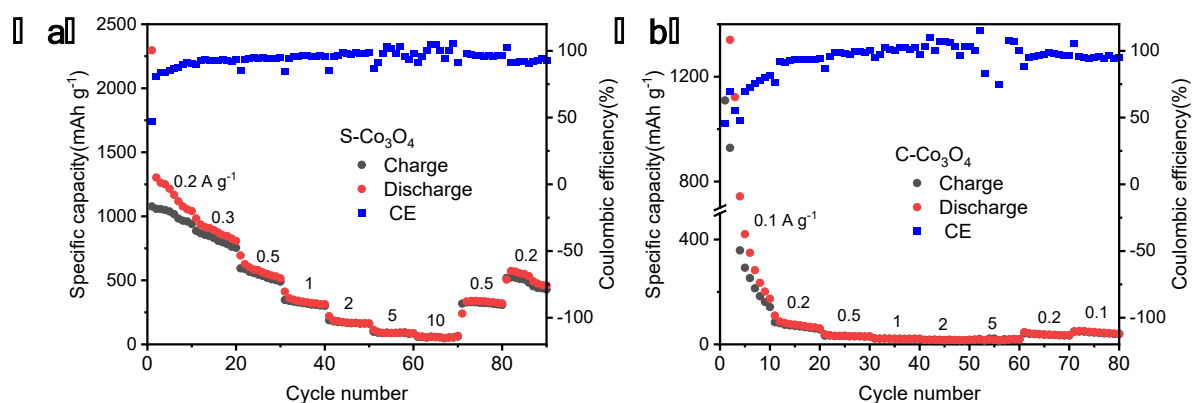

**Figure S7.** Rate performance of (a) S-Co<sub>3</sub>O<sub>4</sub> and (b) C-Co<sub>3</sub>O<sub>4</sub>.

The rate performance of the S-Co<sub>3</sub>O<sub>4</sub> electrode is measured at 0.2, 0.3, 0.5, 1, 2, 5, 10, 0.5 and 0.2 A g<sup>-1</sup> every ten cycles (Fig. S7a†), and the reversible capacities are 1303.0, 936.4, 626.6, 360.1, 186.9, 98.7, 61.1, 334.7 and 572.4 mAh g<sup>-1</sup>, respectively. As for the C-Co<sub>3</sub>O<sub>4</sub> electrode, it presents a reversible capacity of 1121.9, 87.5, 35.1, 22.2, 16.1, 18.1, 42.3 and 51.1 mAh g<sup>-1</sup> at the current of 0.1, 0.2, 0.5, 1, 2, 5, 0.2 and 0.1 A g<sup>-1</sup>, respectively.

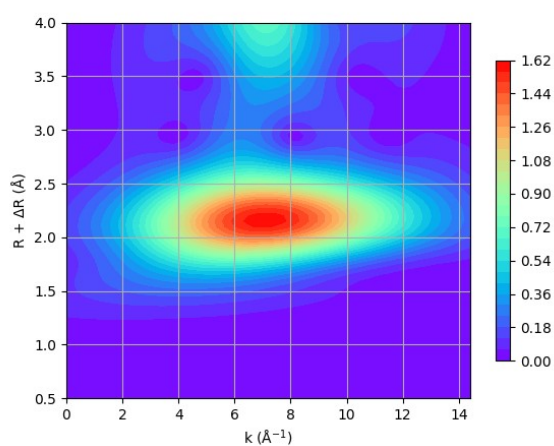

**Figure S8.** WT contour plots of Co-foil.

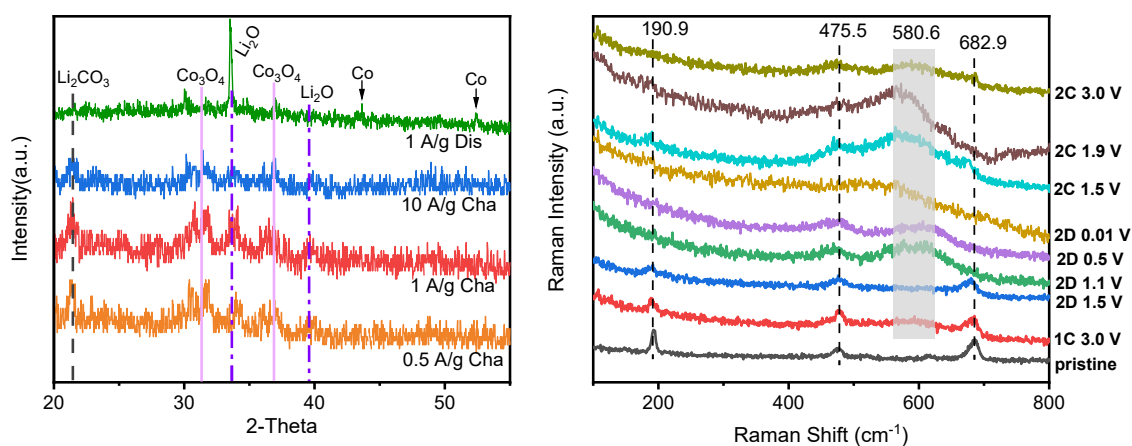

**Figure S9.** (a) Ex situ XRD patterns of S-Co<sub>3</sub>O<sub>4</sub> electrodes collected after fully discharged and fully charged after 10 cycles at different current densities; (b) Ex situ Raman spectra of S-Co<sub>3</sub>O<sub>4</sub> electrodes collected during the first and the second diacharge/charge process.

For ex situ XRD, the fully charged electrodes at different current density are mainly Co<sub>3</sub>O<sub>4</sub> accompanied by little residual Li<sub>2</sub>O and Li<sub>2</sub>CO<sub>3</sub> in SEI layer, while the fully discharged electrode is mainly Co metal and Li<sub>2</sub>O. For ex situ Raman, 1C, 2D and 2C denote the first charge, the second discharge and the second charge, respectively. The peaks located at 190.9, 475.8 and 682.9 cm<sup>-1</sup> are related to Co<sub>3</sub>O<sub>4</sub>, and the appearance of the broad peak at around 580.6 cm<sup>-1</sup> is due to Li<sub>2</sub>O and the homogeneous phase Li<sub>x</sub>Co<sub>3</sub>O<sub>4</sub>.<sup>1</sup>

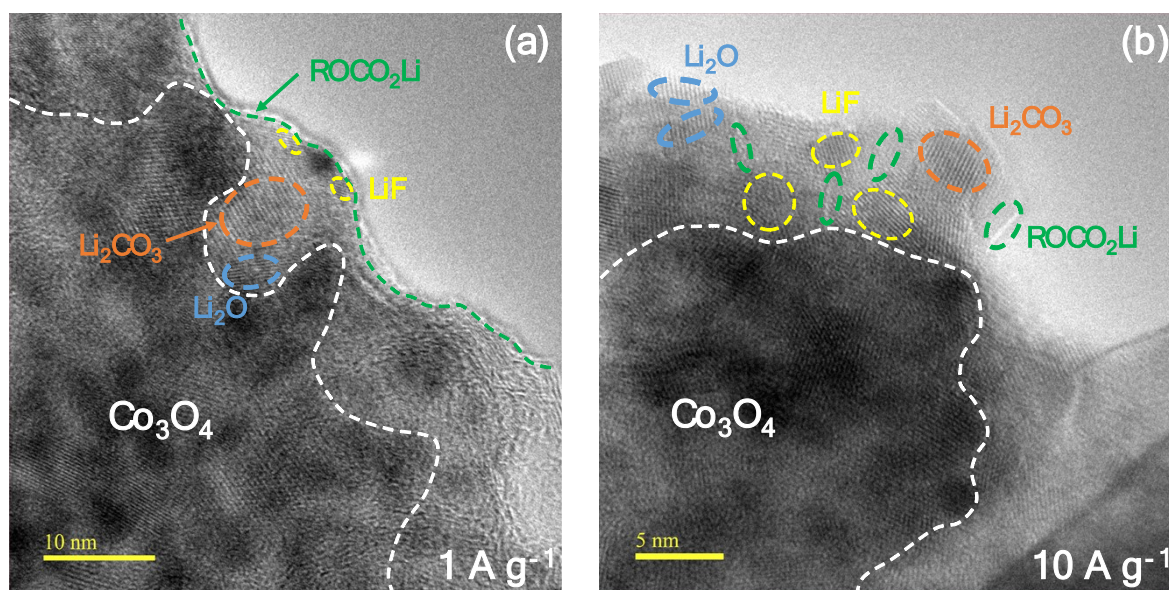

**Figure S10.** HRTEM images of SEI of fully oxidized S-Co<sub>3</sub>O<sub>4</sub> after 10 cycles at (a) 1 A g<sup>-1</sup> and (b) 10 A g<sup>-1</sup>. The LiF (yellow dotted line) lattice spacing corresponding to (111) is ~0.23 nm, the Li<sub>2</sub>CO<sub>3</sub> (orange dotted line) lattice spacing corresponding to (-

110) is  $\sim 0.42$  nm, (-112) is  $\sim 0.26$  nm, and the  $\text{Li}_2\text{O}$  (blue dotted line) lattice spacing corresponding to (111) is  $\sim 0.27$  nm. The green dotted line represents the organic component  $\text{ROCO}_2\text{Li}$  ( $\text{OC} = \text{O}$ ) in the SEI.

The mosaic SEI was composed of randomly distributed organic and inorganic components at  $10 \text{ A g}^{-1}$ , which the organic component ( $\text{ROCO}_2\text{Li}$ ) was an outer layer and the inorganic component was wrapped in an inner layer at  $1 \text{ A g}^{-1}$ . The layered configuration at  $1 \text{ A g}^{-1}$  led to the poor flexibility of the SEI and the unsatisfactory stability of the LIB for long cycle. On the contrary, the random distribution of  $\text{ROCO}_2\text{Li}$  in the mosaic SEI at  $10 \text{ A g}^{-1}$  could enhance the flexibility of the SEI, accelerate the  $\text{Li}^+$  transport and maintain good stability of the LIB.<sup>2</sup>

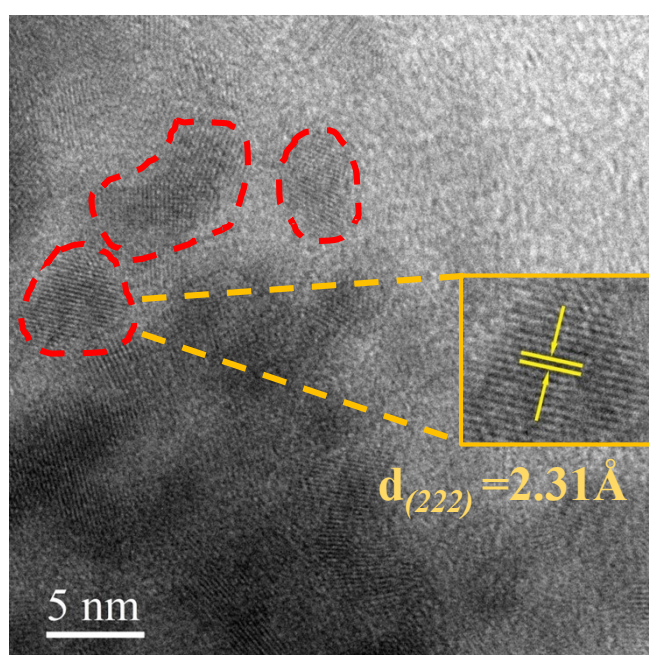

**Figure S11.** HRTEM image of the S- $\text{Co}_3\text{O}_4$  electrode after 2000 cycles at  $10 \text{ A g}^{-1}$ .

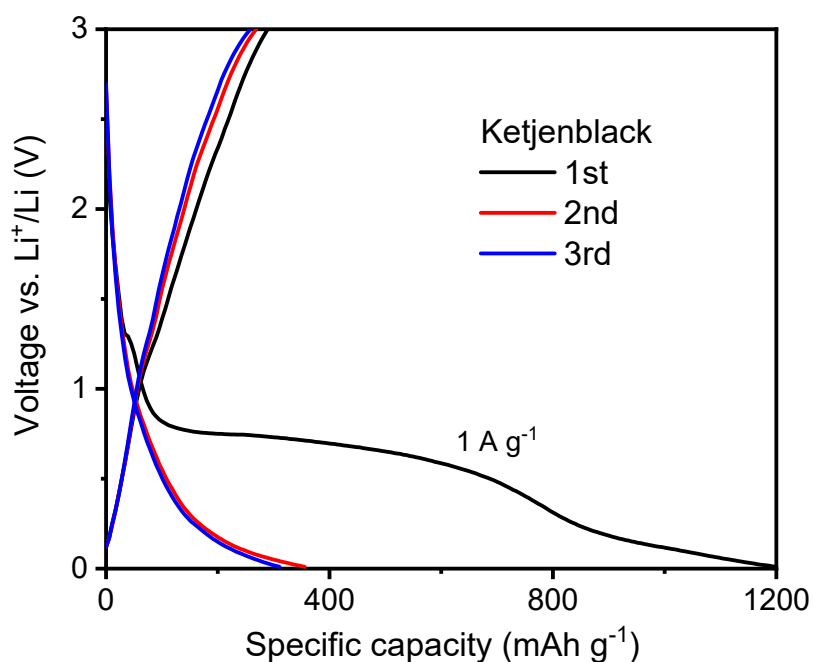

**Figure S12.** The initial three charge/discharge curves at a current density of  $1 \text{ A g}^{-1}$  for Ketjenblack.

Ketjenblack and PVDF were mixed fully with a weight ratio of 9:1. Then made and tested in the same way as  $\text{Co}_3\text{O}_4$ . The first discharge and charge specific capacities of Ketjenblack are  $1200.0 \text{ mAh g}^{-1}$  and  $289.6 \text{ mAh g}^{-1}$ .

**Table S1.** Performances of recently reported LIBs (half-cell) based on  $\text{Co}_3\text{O}_4$ .

| $\text{Co}_3\text{O}_4$                          | Voltage, V<br>(vs. $\text{Li}^+/\text{Li}$ ) | Capacity, $\text{mAh g}^{-1}$  | Cycling stability, <sup>a)</sup><br>$\text{mAh g}^{-1}$ | Refs. |
|--------------------------------------------------|----------------------------------------------|--------------------------------|---------------------------------------------------------|-------|
| RGO- $\text{Co}_3\text{O}_4$ PNR                 | 0.01-3                                       | $1118 @ 0.2 \text{ A g}^{-1}$  | $1118 @ 200\text{th} @ 0.5 \text{ A g}^{-1}$            | 3     |
| $\text{Co}_3\text{O}_4$ PNR                      |                                              | $1049 @ 0.2 \text{ A g}^{-1}$  | $526 @ 200\text{th} @ 0.5 \text{ A g}^{-1}$             |       |
| $\text{Co}_3\text{O}_4 @ \text{NGFs}$            | 0.01-3                                       | $766.4 @ 0.1 \text{ A g}^{-1}$ | $408.4 @ 600\text{th} @ 2 \text{ A g}^{-1}$             | 4     |
| H- $\text{Co}_3\text{O}_4 @ \text{IEH-Graphene}$ | 0.01-3                                       | $777 @ 0.2 \text{ A g}^{-1}$   | $1015 @ 250\text{th} @ 0.2 \text{ A g}^{-1}$            | 5     |

|                             |        |                                |                                                                            |                  |
|-----------------------------|--------|--------------------------------|----------------------------------------------------------------------------|------------------|
| Co3O4 nanotubes             | 0.01-3 | 500 @ 0.05 A g <sup>-1</sup>   | 500 @ 100th @ 0.48 A g <sup>-1</sup>                                       | 6                |
| Co3O4/graphene              | 0.01-3 | 800 @ 0.05 A g <sup>-1</sup>   | 935 @ 30th @ 0.05 A g <sup>-1</sup>                                        | 7                |
| Needle-like Co3O4 nanotubes | 0.01-3 | 918 @ 0.05 A g <sup>-1</sup>   | 380 @ 80th @ 0.05 A g <sup>-1</sup>                                        | 8                |
| Co3O4NW arrays              | 0.01-3 | 700 @ 0.11 A g <sup>-1</sup>   | 450 @ 20th @ 20 C<br>240 @ 20th @ 50 C                                     | 9                |
| C-doped Co3O4 HNTs          | 0.01-3 | 950 @ 0.5 A g <sup>-1</sup>    | 950 @ 300th @ 0.5 A g <sup>-1</sup>                                        | 10               |
| ZnO-Co3O4@CC                | 0.01-3 | 1785 @ 0.2 A g <sup>-1</sup>   | 533.6 @ 400th @ 1 A g <sup>-1</sup><br>447.8 @ 400th @ 2 A g <sup>-1</sup> | 11               |
| HNC-Co3O4                   | 0.01-3 | 1053 @ 0.1 mA cm <sup>-1</sup> | ~600 @ 100th @ 0.1 mA cm <sup>-1</sup>                                     | 2                |
| Co3O4(1000)                 | 0.01-3 | ~650 @ 1 A g <sup>-1</sup>     | 1100 @ 150th @ 1 A g <sup>-1</sup>                                         | 12               |
| Co3O4                       | 0.01-3 | ~1200 @ 1 A g <sup>-1</sup>    | 927 @ 850th @ 1 A g <sup>-1</sup>                                          | 13               |
| <b>S-Co3O4</b>              | 0.01-3 | <b>1686.7 @ 0.1 A g-1</b>      | <b>511.2 @ 2000th @ 10 A g-1</b>                                           | <b>This work</b> |

a) (Cycling stability is expressed as the energy storage capacity retention after several charging/discharging cycles at a specific rate).

**Table S2.** Performances of recently reported LIBs (half-cell) based on different types of anode materials.

| Types  | Materials                                                        | Voltage, V (vs. Li <sup>+</sup> /Li) | Capacity, mAh g <sup>-1</sup> | Cycling stability, <sup>b)</sup> (capacity, rate, retention%) | Refs. |
|--------|------------------------------------------------------------------|--------------------------------------|-------------------------------|---------------------------------------------------------------|-------|
| Oxides | Fe <sub>3</sub> O <sub>4</sub> -α-Fe <sub>2</sub> O <sub>3</sub> | 0.005-3                              | 1100 (0.1 A g <sup>-1</sup> ) | 40<br>(1067, 0.1 A g <sup>-1</sup> , 97%)                     | 14    |
|        | γ-Fe <sub>2</sub> O <sub>3</sub> extracted from red mud          | 0.005-3                              | 697 (0.15 A g <sup>-1</sup> ) | 60<br>(5433, 0.15 A g <sup>-1</sup> , 78%)                    | 15    |
|        | Fe <sub>3</sub> O <sub>4</sub> -HPGN                             | 0.005-3                              | 1002 (0.1 A g <sup>-1</sup> ) | 25<br>(900, 0.1 A g <sup>-1</sup> , ~90%)                     | 16    |

|                                         |                                                                      |            |                                |                                                                                                        |                                           |
|-----------------------------------------|----------------------------------------------------------------------|------------|--------------------------------|--------------------------------------------------------------------------------------------------------|-------------------------------------------|
|                                         | SnO <sub>2</sub> -TRG                                                | 0.005-2.5  | 1021 (0.1 A g <sup>-1</sup> )  | 100<br>(777, 0.5 A g <sup>-1</sup> , 66%)                                                              | 17                                        |
|                                         | SCM-TiO <sub>2</sub>                                                 | 1-3        | 220 (0.15 A g <sup>-1</sup> )  | 250<br>(150, 0.15 A g <sup>-1</sup> , 68%)                                                             | 18                                        |
|                                         | CuCo <sub>2</sub> O <sub>4</sub> nano wall                           | 0.01-3     | 836 (1.25C)                    | 120<br>(550, 0.375C, 61%)                                                                              | 19                                        |
|                                         | MOF-derived CuO                                                      | 0.01-3     | 535 (0.1 A g <sup>-1</sup> )   | 40<br>(481, 0.1 A g <sup>-1</sup> , 90%)                                                               | 20                                        |
| Sulfides                                | Cu <sub>3</sub> SnS <sub>4</sub>                                     | 0.01-3     | 1082 (0.2 A g <sup>-1</sup> )  | 950<br>(890, 0.5 A g <sup>-1</sup> , 76%,)                                                             | 21                                        |
|                                         | SnS <sub>2</sub> -RGO-SnS <sub>2</sub> layer<br>by layer             | 0.01-3     | 1404 (0.1 A g <sup>-1</sup> )  | 200<br>(1357, 0.1 A g <sup>-1</sup> , 97%)<br>(909, 0.5 A g <sup>-1</sup> , 90%)                       | 22                                        |
| Carbides                                | Fe <sub>3</sub> SnC@CNF                                              | 0.01-3     | 573 (0.2 A g <sup>-1</sup> )   | 1000<br>(500, 0.2 and 1 A g <sup>-1</sup> , 96%)                                                       | 23                                        |
|                                         | VC@C                                                                 | 0.01-3     | 640 (0.1 A g <sup>-1</sup> )   | 1000<br>(440, 0.1 and 1 A g <sup>-1</sup> , 82%)                                                       | 24                                        |
|                                         | MXene                                                                | 0.01-3     | 350 (0.1 A g <sup>-1</sup> )   | 1000<br>(330, 0.1 A g <sup>-1</sup> , 94%)                                                             | 25                                        |
|                                         | PMo <sub>12</sub> @PPy/Ti <sub>3</sub> C <sub>2</sub> T <sub>x</sub> | 0.01-3     | 395 (0.1 A g <sup>-1</sup> )   | 300<br>(764, 0.1 A g <sup>-1</sup> , 254%)<br>2000<br>(170, 3 A g <sup>-1</sup> , ~340%)               | 26                                        |
| Metal-<br>organic<br>framework<br>(MOF) | Cu-BDC                                                               | 0.01-2.5   | 194 (0.48 A g <sup>-1</sup> )  | 50<br>(161, 0.48 A g <sup>-1</sup> , 83%)                                                              | 27                                        |
|                                         | Mn-BTC                                                               | 0.01-2     | 694 (0.103 A g <sup>-1</sup> ) | 100<br>(576, 0.103 A g <sup>-1</sup> , 83%)<br>(~400, 1 A g <sup>-1</sup> , ~90%)                      | 28                                        |
|                                         | Co-MOF (BDC)                                                         | 0.01-3     | 1564 (0.1 A g <sup>-1</sup> )  | 700<br>(601, 0.1 and 0.5 A g <sup>-1</sup> , ~67%)<br>1000<br>(435, 0.1 and 1 A g <sup>-1</sup> , 76%) | 29                                        |
|                                         | dual ligand Fe-MOF<br>(DMA cation)                                   | 0.01-3     | 600 (0.25 A g <sup>-1</sup> )  | 100<br>(825, 0.25 A g <sup>-1</sup> , 137%)<br>1100<br>(~460, 1 and 2 A g <sup>-1</sup> , 99%)         | 30                                        |
|                                         | Covalent-<br>organic<br>framework<br>(COF)                           | Tp-Azo COF | 0.01-3                         | 623 (0.1 A g <sup>-1</sup> )                                                                           | 3000<br>(306, 1 A g <sup>-1</sup> , 100%) |
|                                         | IISERP-CON                                                           | 0.01-3     | 720 (0.1 A g <sup>-1</sup> )   | 1000<br>(~580, 0.5 A g <sup>-1</sup> , 98%)                                                            | 32                                        |

|                      |                                                   |                                      |                              |                                             |                                                         |
|----------------------|---------------------------------------------------|--------------------------------------|------------------------------|---------------------------------------------|---------------------------------------------------------|
| Hybrid<br>perovskite | CH <sub>3</sub> NH <sub>3</sub> PbBr <sub>3</sub> | 0.01-2                               | 332 (0.2 A g <sup>-1</sup> ) | 200<br>(121, 0.2 A g <sup>-1</sup> , 36%)   | 33                                                      |
|                      | 1D-benzidine lead<br>iodide                       | 0.01-2.5                             | 646 (0.1 A g <sup>-1</sup> ) | 50<br>(585, 0.1 A g <sup>-1</sup> , 91%)    | 34                                                      |
|                      | iodo bismuthate                                   |                                      |                              |                                             | 35                                                      |
|                      | I. ADB (1D)                                       | 0.01-2.5                             | 520 (0.1 A g <sup>-1</sup> ) | 250<br>(~530, 0.1 A g <sup>-1</sup> , ~62%) |                                                         |
|                      | II. IMB (0D)                                      | 0.01-2.5                             | 450 (0.1 A g <sup>-1</sup> ) | 250<br>(~400, 0.1 A g <sup>-1</sup> , ~77%) |                                                         |
|                      | III. ATB (1D)                                     | 0.01-2.5                             | 230 (0.1 A g <sup>-1</sup> ) | 250<br>(~220, 0.1 A g <sup>-1</sup> , ~44%) |                                                         |
|                      | <b>This work</b>                                  | <b>S-Co<sub>3</sub>O<sub>4</sub></b> | <b>0.01-3</b>                | <b>1686.7 @ 0.1 A g<sup>-1</sup></b>        | <b>2000</b><br><b>(511.2, 10 A g<sup>-1</sup>, 45%)</b> |

b) Cycling stability is expressed as the energy storage capacity retention and corresponding retention percentage after several charging/discharging cycles at a specific rate.

E. g:

“200 (121, 0.2 A g<sup>-1</sup>, 36%)” means that the cell can cycle to 200<sup>th</sup> at 0.2 A g<sup>-1</sup>, with a 36% capacity retention of 121 mAh g<sup>-1</sup>.

“1000 (435, 0.1 and 1 A g<sup>-1</sup>, 76%)” means that the cell can cycle to 1000<sup>th</sup> at 1 A g<sup>-1</sup> after activation at 0.1 A g<sup>-1</sup> for several cycles, with a 76% capacity retention of 435 mAh g<sup>-1</sup>.

#### Supplementary Reference

1. M. A. Islam, M. Zuba, V. DeBiase, N. Noviasky and C. J. Hawley, *Nanotechnology*, 2018, **29**, 075403.



2. Y. Xiang, Y. Xu, Z. Yang, J. Na, A. Alowasheer, M. D. Albaqami, A. Ahmed Awadh Bahajjaj, S. Wang, J. Yu and Y. Yamauchi, *Chem. Eng. J.*, 2022, **430**, 132700.
3. J. Shi, X. Li, T. Yang, X. Tian, Y. Liu, S. Lei, Y. Song and Z. Liu, *Journal of Materials Science*, 2021, **56**, 7520-7532.
4. Y. Chen, T. Wu, W. Chen, W. Zhang, L. Zhang, Z. Zhu, M. Shao, B. Zheng, S. Li, W. Zhang, W. B. Pei, J. Wu and F. Huo, *Chem Commun (Camb)*, 2020, **56**, 5767-5770.
5. D. Wu, C. Wang, H. Wu, S. Wang, F. Wang, Z. Chen, T. Zhao, Z. Zhang, L. Y. Zhang and C. M. Li, *Carbon*, 2020, **163**, 137-144.
6. W. Y. Li, L. N. Xu and J. Chen, *Adv. Funct. Mater.*, 2005, **15**, 851-857.
7. W. C. R. Z. S. Wu, L. Wen, L. B. Gao, J. P. Zhao, Z. P. Chen, G. M. Zhou, F. Li, H. M. Cheng, *ACS nano*, 2010, **4**, 3187.
8. X. W. Lou, D. Deng, J. Y. Lee, J. Feng and L. A. Archer, *Adv. Mater.*, 2008, **20**, 258-262.
9. B. T. a. Y. G. Li, Y. Y. Wu, *Nano Lett.*, 2008, **8**, 265.
10. C. Yan, Y. Zhu, Y. Li, Z. Fang, L. Peng, X. Zhou, G. Chen and G. Yu, *Adv. Funct. Mater.*, 2018, **28**, 1705951.
11. H. Chen, L. Deng, S. Luo, X. Ren, Y. Li, L. Sun, P. Zhang, G. Chen and Y. Gao, *J. Electrochem. Soc.*, 2018, **165**, A3932-A3942.
12. J. Y. Cheong, J. H. Chang, S.-H. Cho, J.-W. Jung, C. Kim, K. S. Dae, J. M. Yuk and I.-D. Kim, *Electrochim. Acta*, 2019, **295**, 7-13.
13. H. Sun, G. Xin, T. Hu, M. Yu, D. Shao, X. Sun and J. Lian, *Nat Commun*, 2014, **5**, 4526.
14. M. Biswal, A. Suryawanshi, V. Thakare, S. Jouen, B. Hannoyer, V. Aravindan, S. Madhavi and S. Ogale, *J. Mater. Chem. A*, 2013, **1**, 13932-13940.
15. A. Suryawanshi, V. Aravindan, S. Madhavi and S. Ogale, *ChemSusChem*, 2016, **9**, 2193-2200.
16. A. Suryawanshi, V. Aravindan, D. Mhamane, P. Yadav, S. Patil, S. Madhavi and S. Ogale, *Energy Storage Materials*, 2015, **1**, 152-157.
17. D. Mhamane, V. Aravindan, D. Taneja, A. Suryawanshi, O. Game, M. Srinivasan and S. Ogale, *Compos. Sci. Technol.*, 2016, **130**, 88-95.
18. O. Game, T. Kumari, U. Singh, V. Aravindan, S. Madhavi and S. B. Ogale, *Energy Storage Materials*, 2016, **3**, 106-112.
19. M. Bhardwaj, A. Suryawanshi, R. Fernandes, S. Tonda, A. Banerjee, D. Kothari and S. Ogale, *Mater. Res. Bull.*, 2017, **90**, 303-310.
20. A. Banerjee, U. Singh, V. Aravindan, M. Srinivasan and S. Ogale, *Nano Energy*, 2013, **2**, 1158-1163.
21. N. Sharma, D. Phase, M. O. Thotiyil and S. Ogale, *ChemElectroChem*, 2019, **6**, 1371-1375.
22. Y. Jiang, D. Song, J. Wu, Z. Wang, S. Huang, Y. Xu, Z. Chen, B. Zhao and J. Zhang, *ACS Nano*, 2019, **13**, 9100-9111.

23. K. Roy, V. Chavan, S. M. Hossain, S. Haldar, R. Vaidhyanathan, P. Ghosh and S. B. Ogale, *ChemSusChem*, 2020, **13**, 196-204.
24. M. Mahajan, K. Roy, S. Parmar, G. Singla, O. P. Pandey, K. Singh, R. Vaidhyanathan and S. Ogale, *Carbon*, 2020, **161**, 108-116.
25. A. Sengupta, B. V. B. Rao, N. Sharma, S. Parmar, V. Chavan, S. K. Singh, S. Kale and S. Ogale, *Nanoscale*, 2020, **12**, 8466-8476.
26. M. Mahajan, G. Singla and S. Ogale, *ACS Applied Energy Materials*, 2021, **4**, 4541-4550.
27. R. Senthil Kumar, C. Nithya, S. Gopukumar and M. Anbu Kulandainathan, *Energy Technology*, 2014, **2**, 921-927.
28. S. Maiti, A. Pramanik, U. Manju and S. Mahanty, *ACS Appl Mater Interfaces*, 2015, **7**, 16357-16363.
29. C. Li, X. Hu, X. Lou, L. Zhang, Y. Wang, J.-P. Amoureux, M. Shen, Q. Chen and B. Hu, *J. Mater. Chem. A*, 2016, **4**, 16245-16251.
30. N. Sharma, S. Szunerits, R. Boukherroub, R. Ye, S. Melinte, M. O. Thotiyl and S. Ogale, *ACS Applied Energy Materials*, 2019, **2**, 4450-4457.
31. G. Zhao, Y. Zhang, Z. Gao, H. Li, S. Liu, S. Cai, X. Yang, H. Guo and X. Sun, *ACS Energy Letters*, 2020, **5**, 1022-1031.
32. S. Haldar, K. Roy, S. Nandi, D. Chakraborty, D. Puthusseri, Y. Gawli, S. Ogale and R. Vaidhyanathan, *Adv. Energy Mater.*, 2018, **8**, 1702170.
33. H. R. Xia, W. T. Sun and L. M. Peng, *Chem Commun (Camb)*, 2015, **51**, 13787-13790.
34. M. Tathavadekar, S. Krishnamurthy, A. Banerjee, S. Nagane, Y. Gawli, A. Suryawanshi, S. Bhat, D. Puthusseri, A. D. Mohite and S. Ogale, *J. Mater. Chem. A*, 2017, **5**, 18634-18642.
35. K. Roy, T. Li, S. Ogale and N. Robertson, *J. Mater. Chem. A*, 2021, **9**, 2689-2693.
